# Supplementary material for: Cardiac Safety of mRNA-Based Vaccines in Patients with Systemic Lupus Erythematosus and Lupus-like Disorders with a History of Myocarditis
Source: MDPI journal article supplement (doi:10.3390/pathogens11091001), 2022-09-01
Supplement: s1 [file s1]

## Supplementary materials

**Table S1.** Timing and availability of biomarker data.

|                                                        | Baseline | After dose 1 | After dose 2 | After Vaccination | After dose 3 | End of follow up |
|--------------------------------------------------------|----------|--------------|--------------|-------------------|--------------|------------------|
| Number of subjects                                     | 13       | 6            | 10           | 10                | 5            | 9                |
| Timing from the last vaccine dose (days)               |          |              |              |                   |              |                  |
| Patient #1                                             | NA       | ND           | 4            | NA                | 17           | 227              |
| Patient #2                                             | NA       | 7            | 46           | NA                | 2            | 151              |
| Patient #3                                             | NA       | ND           | 3            | NA                | 7            | 49               |
| Patient #4                                             | NA       | 18           | 17           | NA                | ND           | 55               |
| Patient #5                                             | NA       | 5            | 5            | NA                | 2            | ND               |
| Patient #6                                             | NA       | 29           | ND           | NA                | ND           | ND               |
| Patient #7                                             | NA       | ND           | 3            | NA                | ND           | 86               |
| Patient #8                                             | NA       | 2            | ND           | NA                | ND           | 249              |
| Patient #9                                             | NA       | ND           | 2            | NA                | ND           | ND               |
| Patient #10                                            | NA       | 21           | 20           | NA                | ND           | 126              |
| Patient #11                                            | NA       | ND           | 38           | NA                | ND           | 168              |
| Patient #12                                            | NA       | ND           | ND           | NA                | ND           | ND               |
| Patient #13                                            | NA       | ND           | 17           | NA                | 15           | 47               |
| Timing from the last vaccine dose (days): median (IQR) | NA       | 13 (6-20)    | 17 (4-29)    | NA                | 7 (2-15)     | 86 (55-168)      |
| Within one week                                        | NA       | 3/6          | 5/11         | NA                | 3/5          | 0/9              |
| Within one month                                       | NA       | 6/6          | 8/11         | NA                | 4/5          | 0/9              |
| Before the following timepoint                         | NA       | 6/6          | 11/11        | NA                | 5/5          | NA               |

$\Delta$  Troponin T

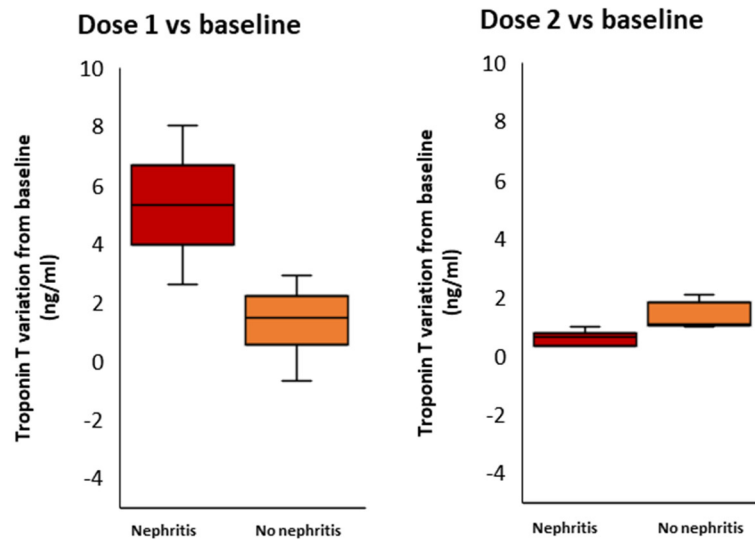

$\Delta$  proBNP

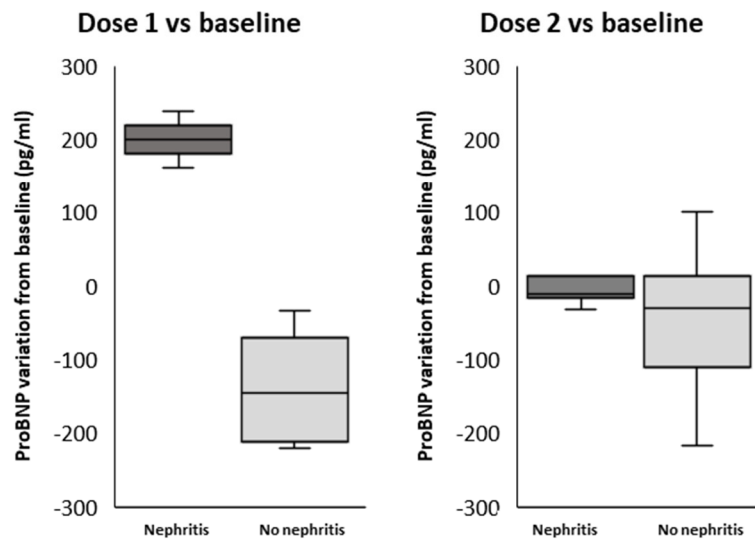

**Figure S1. Trends of troponin T and proBNP in patients with and without nephritis.**

Boxplots showing the differences in troponin T (upper quadrants) and proBNP (lower quadrants) trends in patients with vs without a history of nephritis. Variations in troponin T and proBNP were calculated as the differences between troponin T and proBNP values after dose 1 (left quadrants) and baseline and between values after dose 2 and baseline (right quadrants).

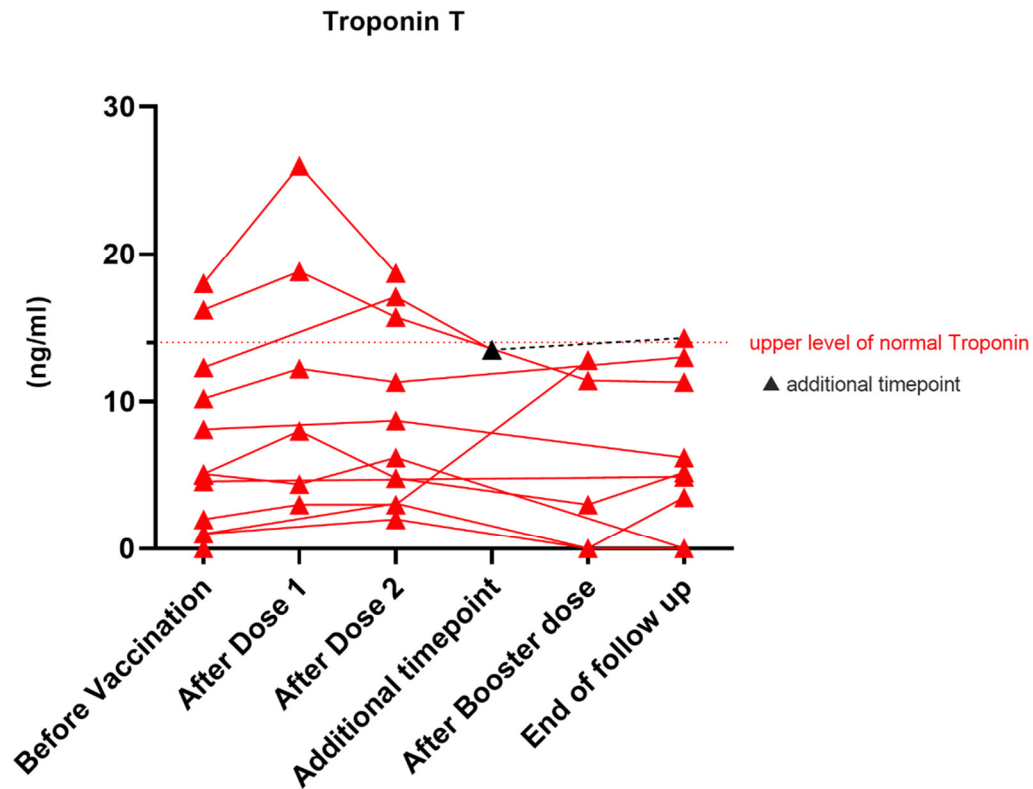

**Figure S2. Individual trends of troponin T.**

Line charts showing trends of Troponin levels over time. Dotted lines indicate the upper limit of normality.

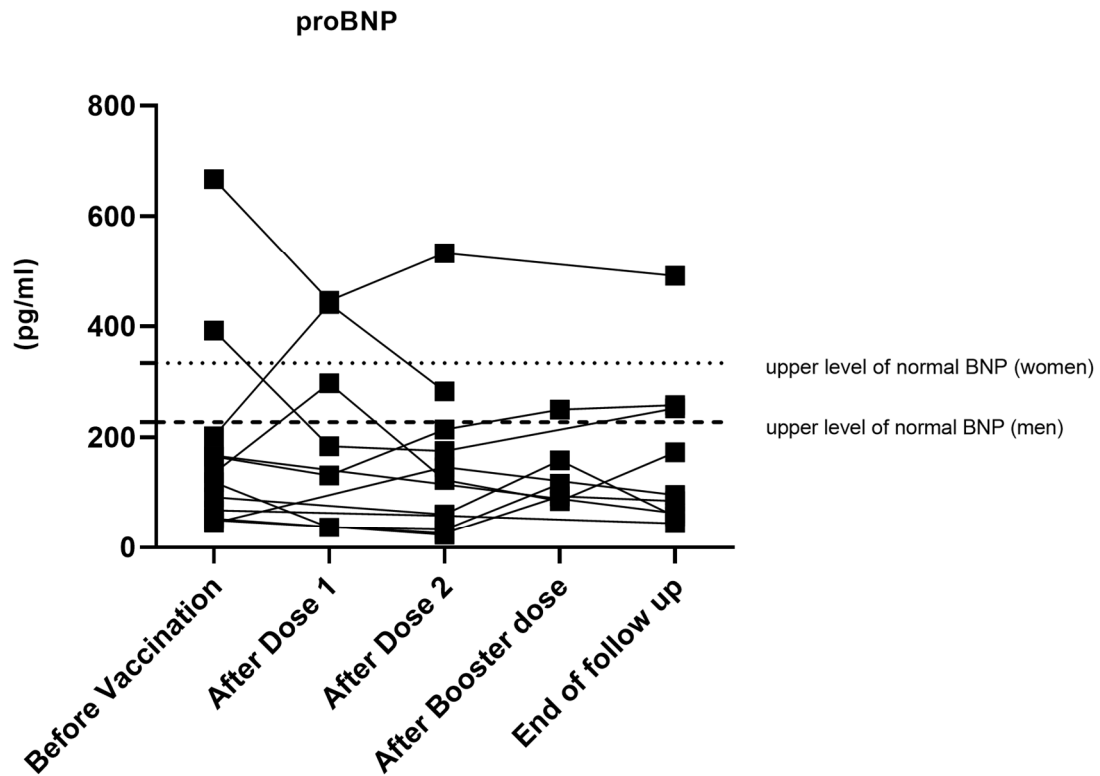

**Figure S3. Individual trends of proBNP.**

Line charts showing trends of proBNP levels over time. Dotted lines indicate the upper limits of normality in women and men.

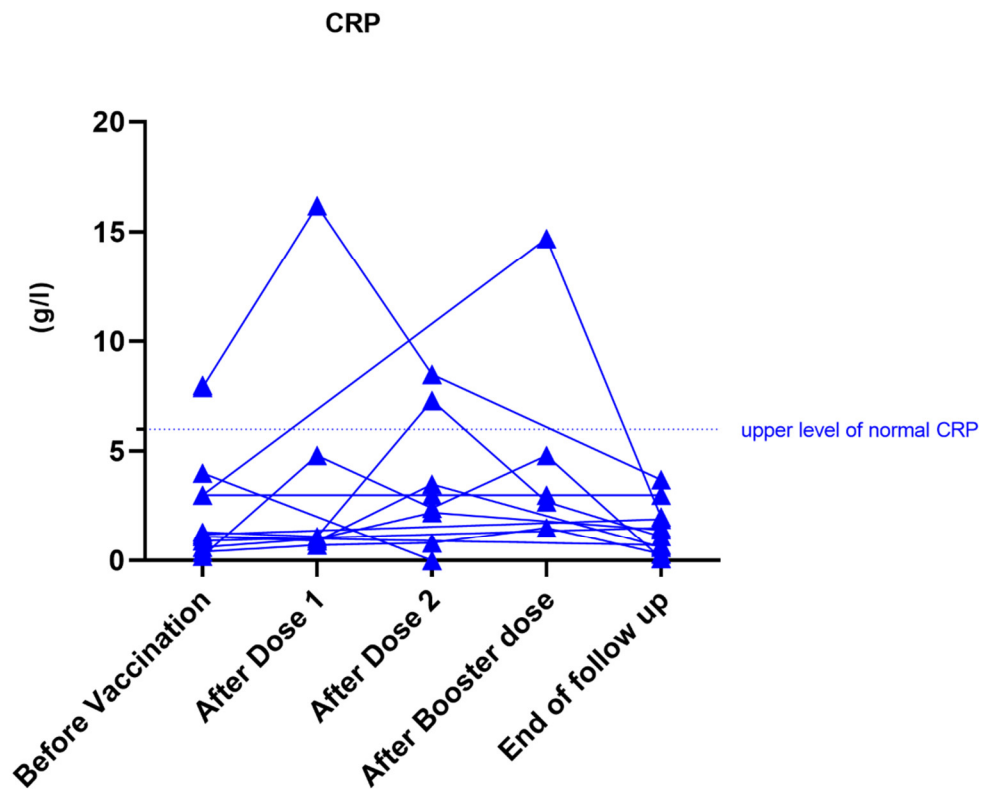

**Figure S4. Individual trends of C-reactive protein.**

Line charts showing trends of C-reactive protein levels over time. Dotted lines indicate the upper limit of normality.
